# Supplementary material for: Development of a multiplexed bead-based assay for detection of DNA methylation in cancer-related genes
Source: Royal Society of Chemistry journal article supplement (doi:10.1039/b813077a), 2008-12-24
Supplement: b813077a.pdf [file b813077a.pdf]

Figure S1: SPARC ALIGNMENT

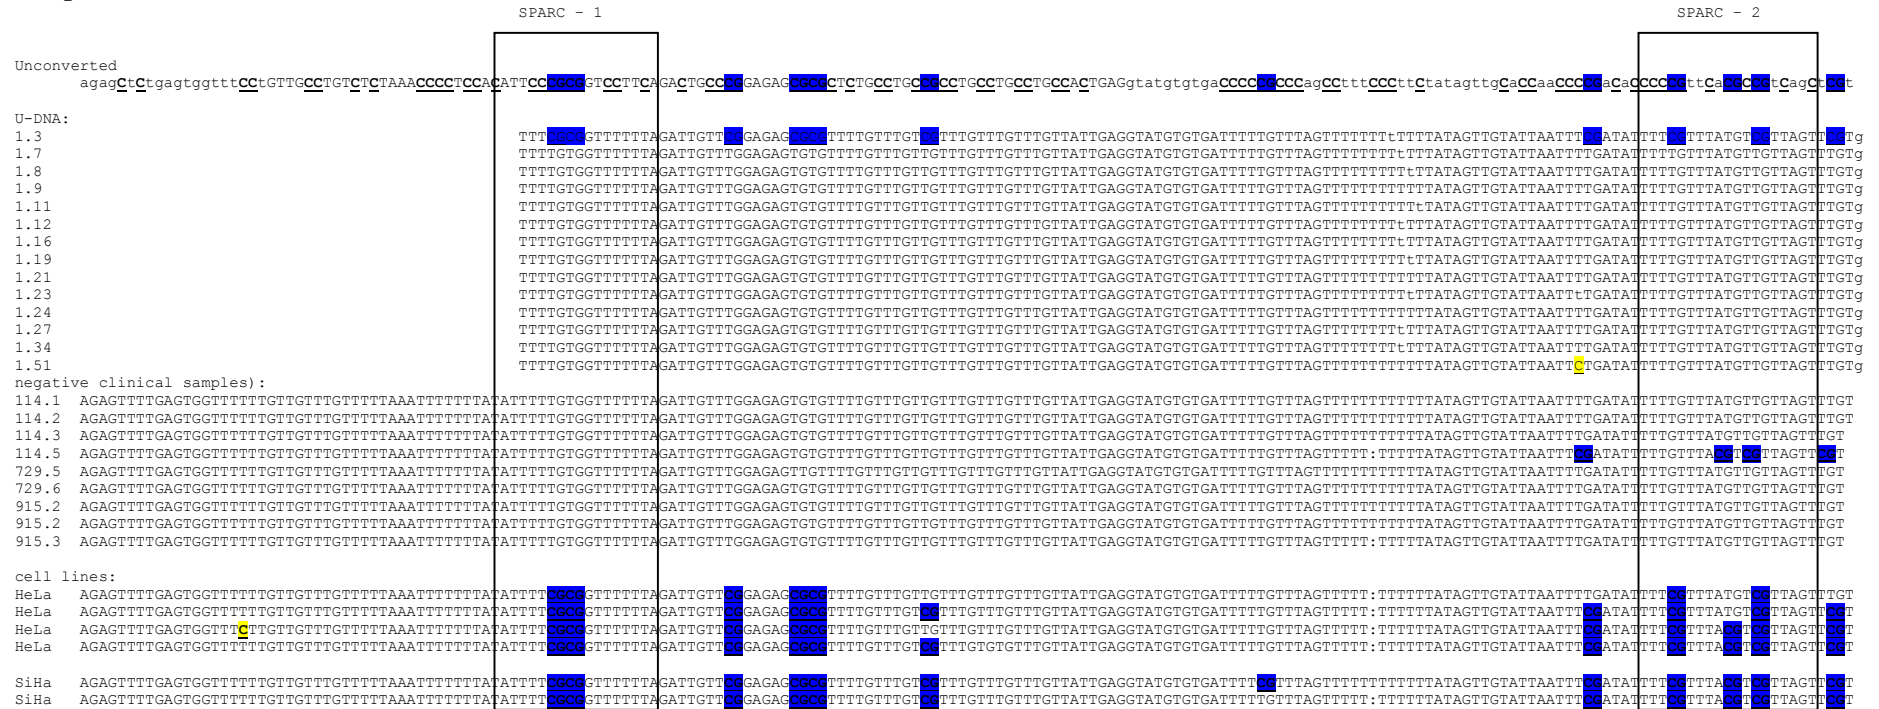

For 49 samples containing 65 unmethylated cytosine bases before bisulfite conversion, only 2 unmethylated cytosine remains after conversion  
Therefore 2/(65x49) = 0.06%. In other words, conversion is 99.9% efficient

Blue text: methylated CG dinucleotides  
Yellow text: unconverted C bases  
Box denotes the approximate position of probes used in the study

Figure S2.

a) TFPI2 Alignment

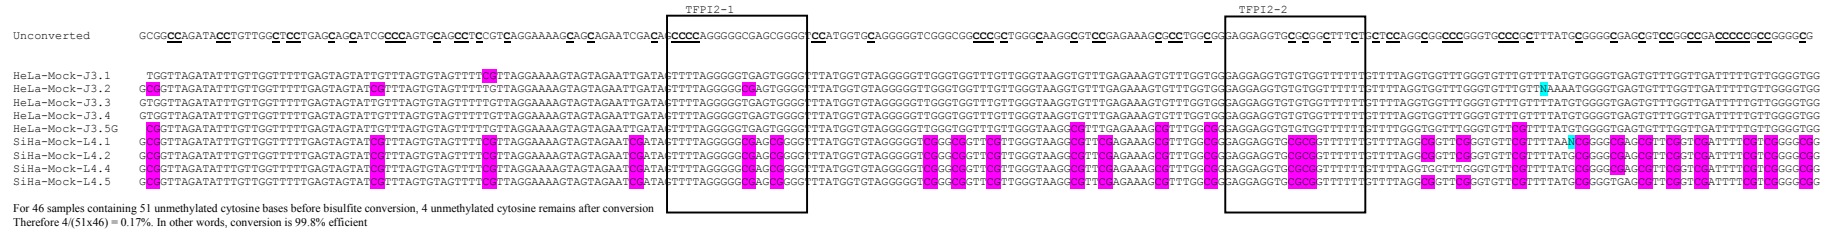

Blue text: methylated CG dinucleotides

Yellow text: unconverted C bases

Box denotes approximate position of probes used in the study.

b) MethyLight data

MethyLight PMR Values for TFPI2 DNA

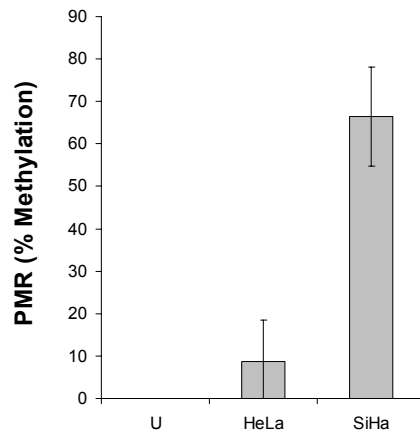

Semi-quantitative MSP-based method suggests negligible methylation in U DNA for TFPI2; low but variable methylation for HeLa DNA and high level of methylation for SiHa
